# Supplementary material for: Compositional Dynamics of Gastrointestinal Tract Microbiomes Associated with Dietary Transition and Feeding Cessation in Lake Sturgeon Larvae
Source: MDPI journal article supplement (doi:10.3390/microorganisms10091872), 2022-09-19
Supplement: s1 [file s1]

**Table S3.** Comparison of the phyla in GI tract samples of fish from CR and TR. Mean proportion were calculated across tank replicate. ND indicate that the phylum was not detected.

| Phyla            | Stages | Proportion by Treatment |         |
|------------------|--------|-------------------------|---------|
|                  |        | CR                      | TR      |
| Acidobacteria    | 14dpf  | 0.386%                  | 0.047%  |
| Actinobacteria   | 14dpf  | 5.121%                  | 8.808%  |
| Armatimonadetes  | 14dpf  | ND                      | 0.892%  |
| Bacteroidetes    | 14dpf  | 0.357%                  | 12.935% |
| Chlamydiae       | 14dpf  | ND                      | 0.007%  |
| Chloroflexi      | 14dpf  | ND                      | 0.022%  |
| Firmicutes       | 14dpf  | 27.174%                 | 14.512% |
| Fusobacteria     | 14dpf  | 0.004%                  | ND      |
| OP11             | 14dpf  | 0.004%                  | ND      |
| Planctomycetes   | 14dpf  | 0.091%                  | ND      |
| Proteobacteria   | 14dpf  | 65.599%                 | 53.703% |
| Verrucomicrobia  | 14dpf  | 0.193%                  | 6.487%  |
| unclassified     | 14dpf  | 1.071%                  | 2.586%  |
| Phyla            | Stages | CR                      | TR      |
| Acidobacteria    | 21dpf  | 0.175%                  | 5.912%  |
| Actinobacteria   | 21dpf  | 22.613%                 | 13.370% |
| Armatimonadetes  | 21dpf  | 0.040%                  | 0.863%  |
| Bacteroidetes    | 21dpf  | 0.062%                  | 15.255% |
| Chlamydiae       | 21dpf  | 0.113%                  | 0.071%  |
| Chlorobi         | 21dpf  | ND                      | 0.033%  |
| Chloroflexi      | 21dpf  | 0.543%                  | 0.301%  |
| Fusobacteria     | 21dpf  | ND                      | 3.590%  |
| Firmicutes       | 21dpf  | 20.224%                 | 5.508%  |
| Gemmatimonadetes | 21dpf  | 0.011%                  | 1.027%  |

|                        |               |           |           |
|------------------------|---------------|-----------|-----------|
| <b>Lentisphaerae</b>   | 21dpf         | ND        | 0.005%    |
| <b>Nitrospira</b>      | 21dpf         | ND        | 0.098%    |
| <b>OD1</b>             | 21dpf         | ND        | 0.175%    |
| <b>OP11</b>            | 21dpf         | ND        | 0.055%    |
| <b>Planctomycetes</b>  | 21dpf         | 0.433%    | 0.301%    |
| <b>Proteobacteria</b>  | 21dpf         | 54.992%   | 41.788%   |
| <b>SR1</b>             | 21dpf         | ND        | 0.022%    |
| <b>Synergistetes</b>   | 21dpf         | ND        | 0.153%    |
| <b>TM7</b>             | 21dpf         | 0.015%    | 0.038%    |
| <b>Verrucomicrobia</b> | 21dpf         | 0.124%    | 3.344%    |
| <b>unclassified</b>    | 21dpf         | 0.656%    | 8.092%    |
| <b>Phyla</b>           | <b>Stages</b> | <b>CR</b> | <b>TR</b> |
| <b>Acidobacteria</b>   | 36dpf         | 0.014%    | ND        |
| <b>Actinobacteria</b>  | 36dpf         | 0.344%    | 0.082%    |
| <b>Bacteroidetes</b>   | 36dpf         | 0.011%    | 0.388%    |
| <b>Firmicutes</b>      | 36dpf         | 93.536%   | 1.962%    |
| <b>Fusobacteria</b>    | 36dpf         | ND        | 2.595%    |
| <b>OD1</b>             | 36dpf         | ND        | 0.005%    |
| <b>Proteobacteria</b>  | 36dpf         | 6.049%    | 94.328%   |
| <b>Verrucomicrobia</b> | 36dpf         | 0.003%    | ND        |
| <b>unclassified</b>    | 36dpf         | 0.044%    | 0.639%    |
