# Supplementary material for: Compositional Dynamics of Gastrointestinal Tract Microbiomes Associated with Dietary Transition and Feeding Cessation in Lake Sturgeon Larvae
Source: MDPI journal article supplement (doi:10.3390/microorganisms10091872), 2022-09-19
Supplement: s1 [file s1]

**Table S1** Comparisons between total length of larvae from both CR and TR feeding treatments using Welch t-test at each sampling point.  
14dpf

| Source    | df | SS    | MS    | F     | p-value |
|-----------|----|-------|-------|-------|---------|
| Trt       | 1  | 0.139 | 0.139 | 0.246 | 0.646   |
| Residuals | 4  | 2.178 | 0.545 |       |         |
| Total     | 5  |       |       |       |         |

21dpf

| Source    | df | SS    | MS    | F     | p-value |
|-----------|----|-------|-------|-------|---------|
| Trt       | 1  | 1.384 | 1.384 | 1.276 | 0.322   |
| Residuals | 4  | 4.340 | 1.085 |       |         |
| Total     | 5  |       |       |       |         |

36dpf

| Source    | df | SS     | MS     | F      | p-value    |
|-----------|----|--------|--------|--------|------------|
| Trt       | 1  | 537.56 | 537.56 | 111.18 | 0.00046*** |
| Residuals | 4  | 19.34  | 4.83   |        |            |
| Total     | 5  |        |        |        |            |
