# Supplementary material for: Compositional Dynamics of Gastrointestinal Tract Microbiomes Associated with Dietary Transition and Feeding Cessation in Lake Sturgeon Larvae
Source: MDPI journal article supplement (doi:10.3390/microorganisms10091872), 2022-09-19
Supplement: s1 [file s1]

**Table S2.** Results from Generalized Linear Models (GLM) in measures of microbial community diversity (a) Inverse Simpson; (b) OTU richness among fish fed with control brine shrimp diet (**CR**) vs fish transitioned from brine shrimp to bloodworm diet (**TR**) across three different ontogenetic stages (**14**, **21**, and **36 dpf**)

(a) Inverse Simpson

Model: Inverse Simpson ~ Treatment + Stages

| Coefficients                 | Estimate | Standard Error | t-value | Pr (>t)    |
|------------------------------|----------|----------------|---------|------------|
| <b>Intercept</b>             | 0.134    | 0.017          | 8.002   | < 0.001*** |
| <b>Treatments Transition</b> | -0.024   | 0.014          | -3.940  | 0.0017**   |
| <b>Stages 21dpf</b>          | -0.038   | 0.014          | -3.994  | 0.0015**   |
| <b>Stages 36dpf</b>          | -0.085   | 0.093          | 6.015   | < 0.001*** |

Null deviance: 22.277, df 16

Residual deviance: 1.337, df 13

Dispersion parameter for Gamma is 0.112

(b) OTUs richness

Model: OTUs richness ~ Treatment + Stages

| Coefficients                 | Estimate | Standard Error | z-value | Pr (>z)    |
|------------------------------|----------|----------------|---------|------------|
| <b>Intercept</b>             | 3.638    | 0.049          | 74.796  | < 0.001*** |
| <b>Treatments Transition</b> | 1.446    | 0.033          | 44.478  | <0.001***  |
| <b>Stages 21dpf</b>          | 2.108    | 0.044          | 47.664  | <0.001***  |
| <b>Stages 36dpf</b>          | 0.440    | 0.055          | 7.972   | < 0.001*** |

Null deviance: 7227.83, df 16

Residual deviance: 931.49, df 13

Dispersion parameter for Poisson is 1
