# Supplementary material for: Compositional Dynamics of Gastrointestinal Tract Microbiomes Associated with Dietary Transition and Feeding Cessation in Lake Sturgeon Larvae
Source: MDPI journal article supplement (doi:10.3390/microorganisms10091872), 2022-09-19
Supplement: s1 [file s1]

**Table S4.** Predicted functions of the GI tract-associated microbial communities between fish from the CR vs TR treatment across stages. Differentially abundant of these functional genes were tested by Welch-t test comparison at each sampling stage. All means was not significant based on adjusted p-value using False Discovery Rate method (FDR).

| Stages       | Level_2                  | CR Mean     | CR    | CR    | TR Mean | TR Std. | TR    | Diff. betw. | 95%      | 95%      | p-     | FDR   |
|--------------|--------------------------|-------------|-------|-------|---------|---------|-------|-------------|----------|----------|--------|-------|
|              |                          | rel. abund. | Std.  | SEM   | rel.    | dev     | SEM   | means       | lower CI | upper CI | values |       |
|              |                          | (%)         | dev   |       | abund.  |         |       |             |          |          |        |       |
|              |                          |             |       |       | (%)     |         |       |             |          |          |        |       |
| <b>14dpf</b> | Amino Acid Metabolism    | 12.391      | 0.000 | 0.000 | 12.434  | 0.044   | 0.031 | -0.044      | -0.597   | 0.510    | 0.500  | 0.501 |
| <b>14dpf</b> | Biosynthesis of Other    | 1.043       | 0.000 | 0.000 | 1.210   | 0.167   | 0.118 | -0.167      | -2.284   | 1.951    | 0.500  | 0.501 |
|              | Secondary Metabolites    |             |       |       |         |         |       |             |          |          |        |       |
| <b>14dpf</b> | Cancers                  | 0.164       | 0.000 | 0.000 | 0.161   | 0.003   | 0.002 | 0.003       | -0.038   | 0.045    | 0.500  | 0.501 |
| <b>14dpf</b> | Carbohydrate Metabolism  | 11.737      | 0.000 | 0.000 | 12.119  | 0.382   | 0.270 | -0.382      | -5.238   | 4.474    | 0.500  | 0.501 |
| <b>14dpf</b> | Cardiovascular Diseases  | 0.016       | 0.000 | 0.000 | 0.010   | 0.007   | 0.005 | 0.007       | -0.080   | 0.094    | 0.500  | 0.501 |
| <b>14dpf</b> | Cell Communication       | 0.001       | 0.000 | 0.000 | 0.000   | 0.000   | 0.000 | 0.000       | -0.003   | 0.004    | 0.500  | 0.501 |
| <b>14dpf</b> | Cell Growth and Death    | 0.653       | 0.000 | 0.000 | 0.609   | 0.044   | 0.031 | 0.044       | -0.516   | 0.604    | 0.500  | 0.501 |
| <b>14dpf</b> | Cell Motility            | 3.750       | 0.000 | 0.000 | 2.901   | 0.849   | 0.601 | 0.849       | -9.943   | 11.642   | 0.500  | 0.501 |
| <b>14dpf</b> | Circulatory System       | 0.046       | 0.000 | 0.000 | 0.029   | 0.017   | 0.012 | 0.017       | -0.198   | 0.232    | 0.500  | 0.501 |
| <b>14dpf</b> | Digestive System         | 0.035       | 0.000 | 0.000 | 0.047   | 0.012   | 0.009 | -0.012      | -0.167   | 0.143    | 0.500  | 0.501 |
| <b>14dpf</b> | Endocrine System         | 0.590       | 0.000 | 0.000 | 0.525   | 0.065   | 0.046 | 0.065       | -0.763   | 0.893    | 0.500  | 0.501 |
| <b>14dpf</b> | Energy Metabolism        | 6.896       | 0.000 | 0.000 | 7.334   | 0.438   | 0.309 | -0.438      | -5.997   | 5.122    | 0.500  | 0.501 |
| <b>14dpf</b> | Environmental Adaptation | 0.163       | 0.000 | 0.000 | 0.163   | 0.000   | 0.000 | 0.000       | -0.004   | 0.004    | 0.495  | 0.501 |
| <b>14dpf</b> | Enzyme Families          | 2.083       | 0.000 | 0.000 | 2.219   | 0.136   | 0.096 | -0.136      | -1.861   | 1.589    | 0.500  | 0.501 |
| <b>14dpf</b> | Excretory System         | 0.031       | 0.000 | 0.000 | 0.045   | 0.014   | 0.010 | -0.014      | -0.186   | 0.159    | 0.500  | 0.501 |

|              |                                             |        |       |       |        |       |       |        |         |        |       |       |
|--------------|---------------------------------------------|--------|-------|-------|--------|-------|-------|--------|---------|--------|-------|-------|
| <b>14dpf</b> | Folding, Sorting and<br>Degradation         | 2.762  | 0.000 | 0.000 | 2.894  | 0.132 | 0.093 | -0.132 | -1.810  | 1.546  | 0.500 | 0.501 |
| <b>14dpf</b> | Glycan Biosynthesis and<br>Metabolism       | 2.354  | 0.000 | 0.000 | 2.687  | 0.334 | 0.236 | -0.334 | -4.572  | 3.905  | 0.500 | 0.501 |
| <b>14dpf</b> | Immune System                               | 0.055  | 0.000 | 0.000 | 0.063  | 0.009 | 0.006 | -0.009 | -0.119  | 0.101  | 0.500 | 0.501 |
| <b>14dpf</b> | Immune System Diseases                      | 0.041  | 0.000 | 0.000 | 0.049  | 0.008 | 0.006 | -0.008 | -0.114  | 0.097  | 0.500 | 0.501 |
| <b>14dpf</b> | Infectious Diseases                         | 0.442  | 0.000 | 0.000 | 0.439  | 0.003 | 0.002 | 0.003  | -0.035  | 0.041  | 0.500 | 0.501 |
| <b>14dpf</b> | Lipid Metabolism                            | 4.565  | 0.000 | 0.000 | 4.545  | 0.020 | 0.014 | 0.020  | -0.236  | 0.277  | 0.500 | 0.501 |
| <b>14dpf</b> | Membrane Transport                          | 13.087 | 0.001 | 0.001 | 11.681 | 1.405 | 0.994 | 1.406  | -16.452 | 19.263 | 0.500 | 0.501 |
| <b>14dpf</b> | Metabolic Diseases                          | 0.104  | 0.000 | 0.000 | 0.111  | 0.007 | 0.005 | -0.007 | -0.097  | 0.083  | 0.500 | 0.501 |
| <b>14dpf</b> | Metabolism of Cofactors<br>and Vitamins     | 4.758  | 0.000 | 0.000 | 5.116  | 0.357 | 0.253 | -0.357 | -4.895  | 4.180  | 0.500 | 0.501 |
| <b>14dpf</b> | Metabolism of Other<br>Amino Acids          | 2.075  | 0.000 | 0.000 | 2.056  | 0.019 | 0.014 | 0.019  | -0.226  | 0.265  | 0.500 | 0.501 |
| <b>14dpf</b> | Metabolism of Terpenoids<br>and Polyketides | 2.699  | 0.000 | 0.000 | 2.681  | 0.018 | 0.013 | 0.018  | -0.210  | 0.245  | 0.501 | 0.501 |
| <b>14dpf</b> | Nervous System                              | 0.088  | 0.000 | 0.000 | 0.091  | 0.003 | 0.002 | -0.003 | -0.046  | 0.039  | 0.500 | 0.501 |
| <b>14dpf</b> | Neurodegenerative<br>Diseases               | 0.336  | 0.000 | 0.000 | 0.266  | 0.070 | 0.049 | 0.070  | -0.819  | 0.958  | 0.500 | 0.501 |
| <b>14dpf</b> | Nucleotide Metabolism                       | 3.655  | 0.000 | 0.000 | 3.950  | 0.295 | 0.209 | -0.295 | -4.043  | 3.453  | 0.500 | 0.501 |
| <b>14dpf</b> | Replication and Repair                      | 8.416  | 0.000 | 0.000 | 8.669  | 0.253 | 0.179 | -0.253 | -3.467  | 2.961  | 0.500 | 0.501 |
| <b>14dpf</b> | Sensory System                              | 0.000  | 0.000 | 0.000 | 0.000  | 0.000 | 0.000 | 0.000  | -0.001  | 0.001  | 0.500 | 0.501 |

|              |                                             |        |       |       |        |       |       |        |        |        |       |       |
|--------------|---------------------------------------------|--------|-------|-------|--------|-------|-------|--------|--------|--------|-------|-------|
| <b>14dpf</b> | Signal Transduction                         | 2.495  | 0.000 | 0.000 | 2.332  | 0.164 | 0.116 | 0.164  | -1.917 | 2.244  | 0.500 | 0.501 |
| <b>14dpf</b> | Signaling Molecules and Interaction         | 0.147  | 0.000 | 0.000 | 0.195  | 0.049 | 0.034 | -0.049 | -0.665 | 0.568  | 0.500 | 0.501 |
| <b>14dpf</b> | Transcription                               | 2.434  | 0.000 | 0.000 | 2.642  | 0.208 | 0.147 | -0.208 | -2.853 | 2.437  | 0.500 | 0.501 |
| <b>14dpf</b> | Translation                                 | 5.454  | 0.000 | 0.000 | 5.544  | 0.089 | 0.063 | -0.090 | -1.225 | 1.046  | 0.499 | 0.501 |
| <b>14dpf</b> | Transport and Catabolism                    | 0.422  | 0.000 | 0.000 | 0.451  | 0.028 | 0.020 | -0.028 | -0.387 | 0.330  | 0.500 | 0.501 |
| <b>14dpf</b> | Xenobiotics Biodegradation and Metabolism   | 4.012  | 0.000 | 0.000 | 3.733  | 0.279 | 0.197 | 0.279  | -3.262 | 3.819  | 0.500 | 0.501 |
| <b>21dpf</b> | Amino Acid Metabolism                       | 12.388 | 0.003 | 0.002 | 12.398 | 0.000 | 0.000 | -0.009 | -0.046 | 0.028  | 0.199 | 0.351 |
| <b>21dpf</b> | Biosynthesis of Other Secondary Metabolites | 1.043  | 0.001 | 0.000 | 1.046  | 0.000 | 0.000 | -0.003 | -0.010 | 0.004  | 0.131 | 0.348 |
| <b>21dpf</b> | Cancers                                     | 0.164  | 0.000 | 0.000 | 0.164  | 0.000 | 0.000 | 0.000  | -0.002 | 0.001  | 0.175 | 0.351 |
| <b>21dpf</b> | Carbohydrate Metabolism                     | 11.736 | 0.000 | 0.000 | 11.744 | 0.000 | 0.000 | -0.008 | -0.010 | -0.006 | 0.006 | 0.057 |
| <b>21dpf</b> | Cardiovascular Diseases                     | 0.016  | 0.000 | 0.000 | 0.017  | 0.000 | 0.000 | 0.000  | -0.001 | 0.001  | 0.304 | 0.433 |
| <b>21dpf</b> | Cell Communication                          | 0.001  | 0.000 | 0.000 | 0.001  | 0.000 | 0.000 | 0.000  | 0.000  | 0.000  | 0.218 | 0.351 |
| <b>21dpf</b> | Cell Growth and Death                       | 0.653  | 0.000 | 0.000 | 0.652  | 0.000 | 0.000 | 0.000  | -0.002 | 0.003  | 0.331 | 0.433 |
| <b>21dpf</b> | Cell Motility                               | 3.748  | 0.000 | 0.000 | 3.734  | 0.000 | 0.000 | 0.014  | 0.011  | 0.018  | 0.008 | 0.059 |
| <b>21dpf</b> | Circulatory System                          | 0.046  | 0.000 | 0.000 | 0.046  | 0.000 | 0.000 | 0.000  | -0.001 | 0.001  | 0.678 | 0.737 |
| <b>21dpf</b> | Digestive System                            | 0.035  | 0.000 | 0.000 | 0.034  | 0.000 | 0.000 | 0.000  | 0.000  | 0.000  | 0.131 | 0.348 |
| <b>21dpf</b> | Endocrine System                            | 0.589  | 0.000 | 0.000 | 0.588  | 0.000 | 0.000 | 0.001  | -0.004 | 0.005  | 0.372 | 0.451 |
| <b>21dpf</b> | Energy Metabolism                           | 6.894  | 0.000 | 0.000 | 6.884  | 0.000 | 0.000 | 0.010  | 0.005  | 0.015  | 0.025 | 0.133 |

|              |                                             |        |       |       |        |       |       |        |        |        |       |       |
|--------------|---------------------------------------------|--------|-------|-------|--------|-------|-------|--------|--------|--------|-------|-------|
| <b>21dpf</b> | Environmental Adaptation                    | 0.163  | 0.000 | 0.000 | 0.163  | 0.000 | 0.000 | 0.000  | 0.000  | 0.001  | 0.132 | 0.348 |
| <b>21dpf</b> | Enzyme Families                             | 2.084  | 0.001 | 0.001 | 2.082  | 0.000 | 0.000 | 0.002  | -0.012 | 0.016  | 0.323 | 0.433 |
| <b>21dpf</b> | Excretory System                            | 0.031  | 0.000 | 0.000 | 0.032  | 0.000 | 0.000 | 0.000  | 0.000  | 0.000  | 0.001 | 0.035 |
| <b>21dpf</b> | Folding, Sorting and<br>Degradation         | 2.762  | 0.000 | 0.000 | 2.758  | 0.000 | 0.000 | 0.004  | -0.001 | 0.009  | 0.058 | 0.237 |
| <b>21dpf</b> | Glycan Biosynthesis and<br>Metabolism       | 2.353  | 0.000 | 0.000 | 2.347  | 0.000 | 0.000 | 0.006  | 0.004  | 0.008  | 0.015 | 0.093 |
| <b>21dpf</b> | Immune System                               | 0.055  | 0.000 | 0.000 | 0.055  | 0.000 | 0.000 | 0.000  | -0.001 | 0.000  | 0.144 | 0.351 |
| <b>21dpf</b> | Immune System Diseases                      | 0.041  | 0.000 | 0.000 | 0.041  | 0.000 | 0.000 | 0.000  | -0.001 | 0.001  | 0.948 | 0.960 |
| <b>21dpf</b> | Infectious Diseases                         | 0.443  | 0.000 | 0.000 | 0.442  | 0.000 | 0.000 | 0.000  | -0.001 | 0.002  | 0.200 | 0.351 |
| <b>21dpf</b> | Lipid Metabolism                            | 4.563  | 0.002 | 0.001 | 4.561  | 0.000 | 0.000 | 0.002  | -0.018 | 0.022  | 0.378 | 0.451 |
| <b>21dpf</b> | Membrane Transport                          | 13.097 | 0.001 | 0.000 | 13.143 | 0.001 | 0.001 | -0.046 | -0.054 | -0.039 | 0.003 | 0.040 |
| <b>21dpf</b> | Metabolic Diseases                          | 0.104  | 0.000 | 0.000 | 0.104  | 0.000 | 0.000 | 0.000  | 0.000  | 0.000  | 0.079 | 0.293 |
| <b>21dpf</b> | Metabolism of Cofactors<br>and Vitamins     | 4.759  | 0.001 | 0.001 | 4.755  | 0.000 | 0.000 | 0.004  | -0.008 | 0.016  | 0.154 | 0.351 |
| <b>21dpf</b> | Metabolism of Other<br>Amino Acids          | 2.075  | 0.001 | 0.000 | 2.076  | 0.000 | 0.000 | -0.001 | -0.008 | 0.005  | 0.291 | 0.433 |
| <b>21dpf</b> | Metabolism of Terpenoids<br>and Polyketides | 2.697  | 0.001 | 0.001 | 2.696  | 0.000 | 0.000 | 0.001  | -0.015 | 0.017  | 0.591 | 0.684 |
| <b>21dpf</b> | Nervous System                              | 0.088  | 0.000 | 0.000 | 0.088  | 0.000 | 0.000 | -0.001 | -0.001 | 0.000  | 0.002 | 0.040 |
| <b>21dpf</b> | Neurodegenerative<br>Diseases               | 0.336  | 0.000 | 0.000 | 0.336  | 0.000 | 0.000 | 0.000  | -0.004 | 0.004  | 0.898 | 0.949 |

|              |                                                     |        |       |       |        |       |       |        |        |       |       |       |
|--------------|-----------------------------------------------------|--------|-------|-------|--------|-------|-------|--------|--------|-------|-------|-------|
| <b>21dpf</b> | Nucleotide Metabolism                               | 3.657  | 0.002 | 0.001 | 3.653  | 0.000 | 0.000 | 0.003  | -0.021 | 0.028 | 0.339 | 0.433 |
| <b>21dpf</b> | Replication and Repair                              | 8.418  | 0.004 | 0.003 | 8.406  | 0.000 | 0.000 | 0.012  | -0.037 | 0.061 | 0.200 | 0.351 |
| <b>21dpf</b> | Sensory System                                      | 0.000  | 0.000 | 0.000 | 0.000  | 0.000 | 0.000 | 0.000  | 0.000  | 0.000 | 0.218 | 0.351 |
| <b>21dpf</b> | Signal Transduction                                 | 2.494  | 0.000 | 0.000 | 2.490  | 0.000 | 0.000 | 0.004  | 0.001  | 0.007 | 0.036 | 0.166 |
| <b>21dpf</b> | Signaling Molecules and<br>Interaction              | 0.147  | 0.000 | 0.000 | 0.147  | 0.000 | 0.000 | 0.000  | -0.002 | 0.002 | 0.960 | 0.960 |
| <b>21dpf</b> | Transcription                                       | 2.436  | 0.002 | 0.001 | 2.437  | 0.000 | 0.000 | -0.001 | -0.021 | 0.019 | 0.614 | 0.688 |
| <b>21dpf</b> | Translation                                         | 5.454  | 0.002 | 0.001 | 5.443  | 0.000 | 0.000 | 0.012  | -0.013 | 0.036 | 0.106 | 0.348 |
| <b>21dpf</b> | Transport and Catabolism                            | 0.422  | 0.000 | 0.000 | 0.421  | 0.000 | 0.000 | 0.001  | -0.002 | 0.003 | 0.210 | 0.351 |
| <b>21dpf</b> | Xenobiotics<br><br>Biodegradation and<br>Metabolism | 4.009  | 0.004 | 0.003 | 4.016  | 0.000 | 0.000 | -0.007 | -0.055 | 0.042 | 0.336 | 0.433 |
| <b>36dpf</b> | Amino Acid Metabolism                               | 11.618 | 0.801 | 0.401 | 11.204 | 0.157 | 0.111 | 0.414  | -1.006 | 1.834 | 0.449 | 0.824 |
| <b>36dpf</b> | Biosynthesis of Other<br>Secondary Metabolites      | 0.898  | 0.150 | 0.075 | 0.904  | 0.009 | 0.006 | -0.006 | -0.280 | 0.268 | 0.947 | 0.993 |
| <b>36dpf</b> | Cancers                                             | 0.146  | 0.018 | 0.009 | 0.157  | 0.027 | 0.019 | -0.011 | -0.216 | 0.193 | 0.747 | 0.954 |
| <b>36dpf</b> | Carbohydrate Metabolism                             | 11.791 | 0.095 | 0.047 | 10.827 | 0.422 | 0.298 | 0.965  | -4.038 | 5.967 | 0.258 | 0.824 |
| <b>36dpf</b> | Cardiovascular Diseases                             | 0.010  | 0.007 | 0.003 | 0.011  | 0.006 | 0.004 | 0.000  | -0.028 | 0.028 | 0.993 | 0.993 |
| <b>36dpf</b> | Cell Communication                                  | 0.000  | 0.000 | 0.000 | 0.000  | 0.000 | 0.000 | 0.000  | 0.000  | 0.001 | 0.182 | 0.824 |
| <b>36dpf</b> | Cell Growth and Death                               | 0.628  | 0.025 | 0.013 | 0.598  | 0.072 | 0.051 | 0.030  | -0.756 | 0.817 | 0.748 | 0.954 |
| <b>36dpf</b> | Cell Motility                                       | 3.092  | 0.674 | 0.337 | 4.910  | 0.414 | 0.293 | -1.818 | -3.694 | 0.058 | 0.054 | 0.465 |
| <b>36dpf</b> | Circulatory System                                  | 0.026  | 0.020 | 0.010 | 0.087  | 0.023 | 0.016 | -0.061 | -0.206 | 0.083 | 0.171 | 0.824 |

|              |                                             |        |       |       |        |       |       |        |         |        |       |       |
|--------------|---------------------------------------------|--------|-------|-------|--------|-------|-------|--------|---------|--------|-------|-------|
| <b>36dpf</b> | Digestive System                            | 0.028  | 0.009 | 0.004 | 0.042  | 0.001 | 0.001 | -0.014 | -0.030  | 0.001  | 0.063 | 0.465 |
| <b>36dpf</b> | Endocrine System                            | 0.407  | 0.183 | 0.091 | 0.389  | 0.031 | 0.022 | 0.018  | -0.307  | 0.343  | 0.879 | 0.956 |
| <b>36dpf</b> | Energy Metabolism                           | 6.461  | 0.434 | 0.217 | 6.804  | 0.469 | 0.331 | -0.344 | -3.251  | 2.564  | 0.598 | 0.851 |
| <b>36dpf</b> | Environmental Adaptation                    | 0.181  | 0.018 | 0.009 | 0.188  | 0.002 | 0.001 | -0.008 | -0.040  | 0.025  | 0.524 | 0.851 |
| <b>36dpf</b> | Enzyme Families                             | 2.456  | 0.379 | 0.190 | 2.221  | 0.073 | 0.051 | 0.235  | -0.438  | 0.907  | 0.373 | 0.824 |
| <b>36dpf</b> | Excretory System                            | 0.041  | 0.010 | 0.005 | 0.019  | 0.003 | 0.002 | 0.022  | 0.004   | 0.040  | 0.027 | 0.465 |
| <b>36dpf</b> | Folding, Sorting and<br>Degradation         | 2.742  | 0.098 | 0.049 | 3.052  | 0.248 | 0.175 | -0.310 | -2.893  | 2.273  | 0.422 | 0.824 |
| <b>36dpf</b> | Glycan Biosynthesis and<br>Metabolism       | 2.098  | 0.264 | 0.132 | 2.859  | 0.030 | 0.021 | -0.760 | -1.236  | -0.285 | 0.014 | 0.465 |
| <b>36dpf</b> | Immune System                               | 0.075  | 0.021 | 0.011 | 0.072  | 0.012 | 0.008 | 0.003  | -0.050  | 0.056  | 0.864 | 0.956 |
| <b>36dpf</b> | Immune System Diseases                      | 0.067  | 0.027 | 0.013 | 0.050  | 0.012 | 0.008 | 0.017  | -0.039  | 0.073  | 0.433 | 0.824 |
| <b>36dpf</b> | Infectious Diseases                         | 0.419  | 0.025 | 0.012 | 0.482  | 0.054 | 0.038 | -0.063 | -0.590  | 0.464  | 0.440 | 0.824 |
| <b>36dpf</b> | Lipid Metabolism                            | 4.078  | 0.506 | 0.253 | 3.821  | 0.056 | 0.040 | 0.257  | -0.655  | 1.169  | 0.447 | 0.824 |
| <b>36dpf</b> | Membrane Transport                          | 14.550 | 1.455 | 0.727 | 13.024 | 1.973 | 1.395 | 1.525  | -13.068 | 16.118 | 0.578 | 0.851 |
| <b>36dpf</b> | Metabolic Diseases                          | 0.103  | 0.002 | 0.001 | 0.095  | 0.005 | 0.003 | 0.008  | -0.040  | 0.056  | 0.332 | 0.824 |
| <b>36dpf</b> | Metabolism of Cofactors<br>and Vitamins     | 4.909  | 0.160 | 0.080 | 4.993  | 0.183 | 0.129 | -0.084 | -1.267  | 1.100  | 0.733 | 0.954 |
| <b>36dpf</b> | Metabolism of Other<br>Amino Acids          | 1.942  | 0.143 | 0.071 | 1.926  | 0.024 | 0.017 | 0.017  | -0.237  | 0.270  | 0.858 | 0.956 |
| <b>36dpf</b> | Metabolism of Terpenoids<br>and Polyketides | 2.268  | 0.438 | 0.219 | 2.005  | 0.059 | 0.041 | 0.263  | -0.522  | 1.048  | 0.379 | 0.824 |

|              |                                           |       |       |       |       |       |       |        |        |        |       |       |
|--------------|-------------------------------------------|-------|-------|-------|-------|-------|-------|--------|--------|--------|-------|-------|
| <b>36dpf</b> | Nervous System                            | 0.095 | 0.008 | 0.004 | 0.083 | 0.006 | 0.004 | 0.012  | -0.017 | 0.041  | 0.237 | 0.824 |
| <b>36dpf</b> | Neurodegenerative Diseases                | 0.258 | 0.079 | 0.039 | 0.475 | 0.091 | 0.064 | -0.216 | -0.807 | 0.374  | 0.204 | 0.824 |
| <b>36dpf</b> | Nucleotide Metabolism                     | 4.231 | 0.593 | 0.297 | 4.151 | 0.039 | 0.027 | 0.080  | -1.002 | 1.162  | 0.831 | 0.956 |
| <b>36dpf</b> | Replication and Repair                    | 9.519 | 1.186 | 0.593 | 9.494 | 0.336 | 0.238 | 0.025  | -2.106 | 2.157  | 0.975 | 0.993 |
| <b>36dpf</b> | Sensory System                            | 0.000 | 0.000 | 0.000 | 0.000 | 0.000 | 0.000 | 0.000  | 0.000  | 0.000  | 0.182 | 0.824 |
| <b>36dpf</b> | Signal Transduction                       | 2.135 | 0.365 | 0.182 | 2.863 | 0.114 | 0.081 | -0.728 | -1.394 | -0.062 | 0.039 | 0.465 |
| <b>36dpf</b> | Signaling Molecules and Interaction       | 0.216 | 0.069 | 0.035 | 0.172 | 0.014 | 0.010 | 0.044  | -0.079 | 0.166  | 0.365 | 0.824 |
| <b>36dpf</b> | Transcription                             | 3.067 | 0.634 | 0.317 | 2.761 | 0.053 | 0.038 | 0.305  | -0.846 | 1.457  | 0.468 | 0.824 |
| <b>36dpf</b> | Translation                               | 5.938 | 0.544 | 0.272 | 6.082 | 0.415 | 0.294 | -0.144 | -2.179 | 1.891  | 0.806 | 0.956 |
| <b>36dpf</b> | Transport and Catabolism                  | 0.322 | 0.101 | 0.050 | 0.358 | 0.023 | 0.016 | -0.036 | -0.215 | 0.143  | 0.598 | 0.851 |
| <b>36dpf</b> | Xenobiotics Biodegradation and Metabolism | 3.184 | 0.902 | 0.451 | 2.820 | 0.192 | 0.136 | 0.363  | -1.234 | 1.960  | 0.551 | 0.851 |
